# Supplementary material for: Evaluating associations between patient-to-nurse ratios and mortality, process of care events and vital sign documentation on paediatric wards: a secondary analysis of data from the EPOCH cluster-randomised trial
Source: HighWire-hosted journal article supplement (doi:10.1136/bmjopen-2023-081645), 2024-07-01

**Supplementary Figure 1A**

The association of the study outcomes and nurse staffing by study period, excluding site 21 (sensitivity analysis)

**Figure 1A:** After excluding the site with outlying patient-nurse ratios in all three period, the association of the mortality and process of care study outcomes and nurse staffing. Each of the 6 panels plots the rate of the outcome in a period at a site against the average patient-nurse ratio in that period at that site, with the areas of the circles being proportional to the number of patient discharges or number of ward days. The fitted values from the univariate random effects models are shown by the solid line (mean) and shaded area (95% CrI).

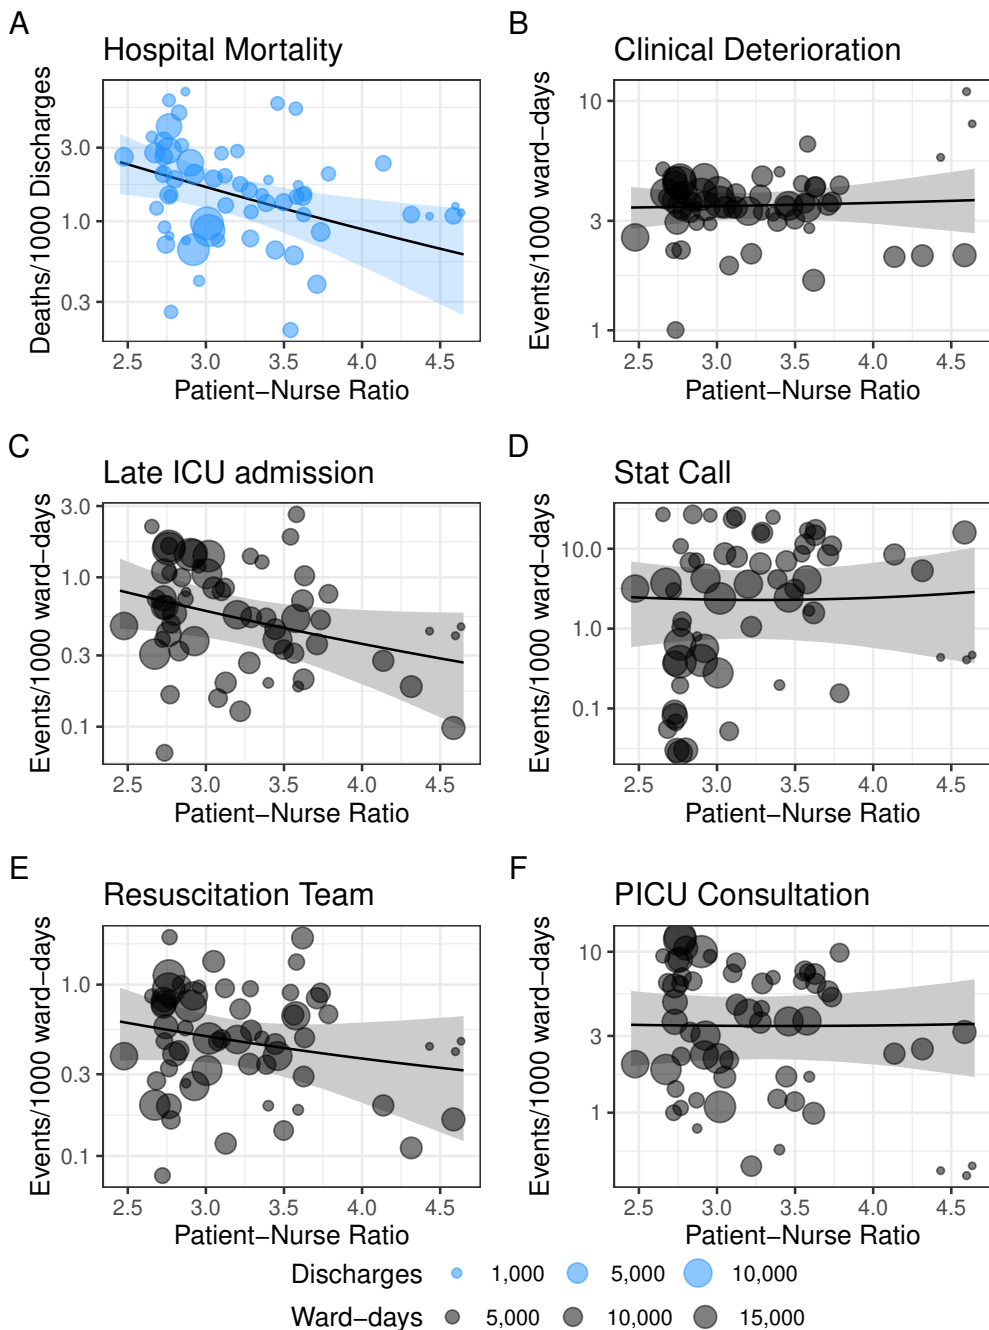

Supplement: bmjopen-2023-081645supp002_data_supplement.pdf [file bmjopen-2023-081645supp002_data_supplement.pdf]
